# Supplementary material for: The fission yeast septation initiation network (SIN) kinase, Sid2, is required for SIN asymmetry and regulates the SIN scaffold, Cdc11
Source: PubMed Central journal article supplement — Mol Biol Cell. 2012 May 1;23(9):1636–45. doi: 10.1091/mbc.E11-09-0792 (PMC3338431; doi:10.1091/mbc.e11-09-0792), 2012-05-01
Supplement: supp_E11-09-0792_CombinedSupMats.pdf [file supp_E11-09-0792_CombinedSupMats.pdf]

| Component | <i>sid2-TAP cdc16-116</i> |                 |
|-----------|---------------------------|-----------------|
|           | I <sup>a</sup>            | II <sup>b</sup> |
| Sid2      | 35.1                      | 336             |
| Cdc11     | 18.3                      | 126             |
| Sid4      | 16.5                      | 44              |
| Mob1      | 17.1                      | 33              |

<sup>a</sup>Percentage of each protein identified by mass spectrometry.

<sup>b</sup>Number of unique tryptic peptides of each protein identified by mass spectrometry.

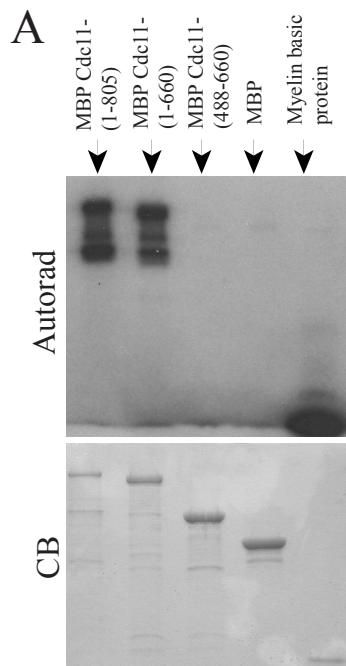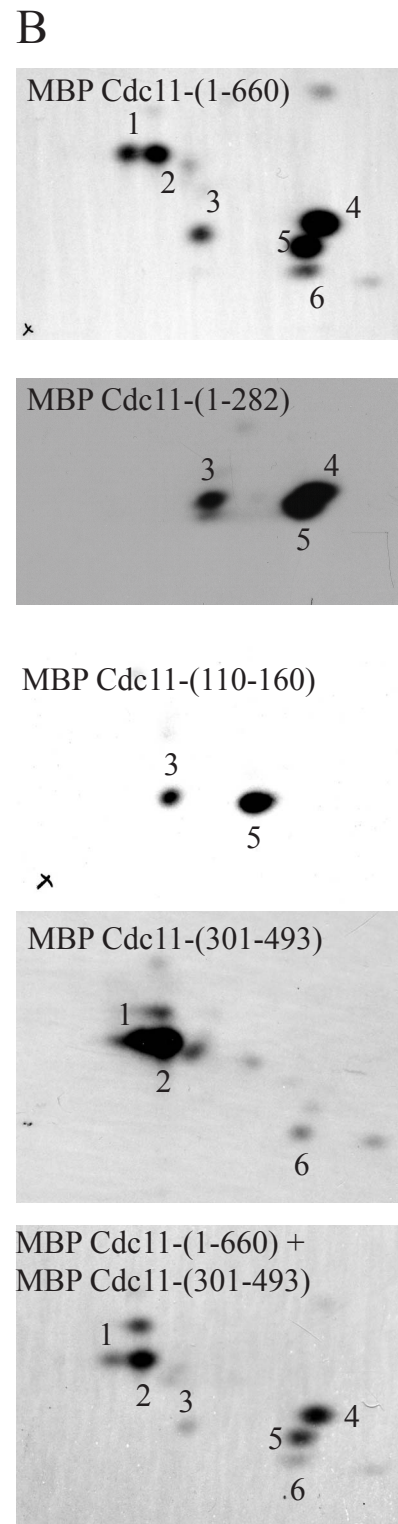

Figure S2

A

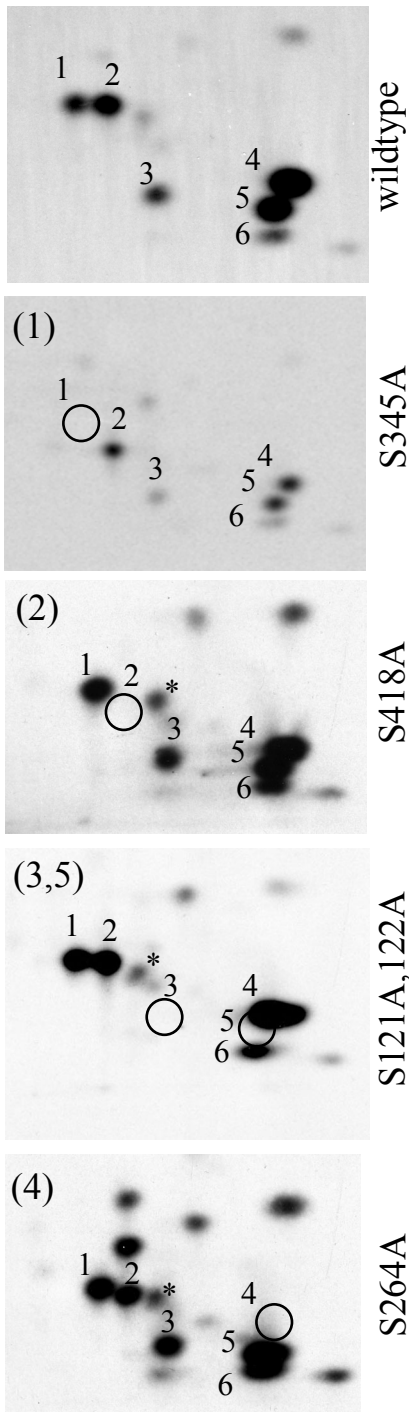

B

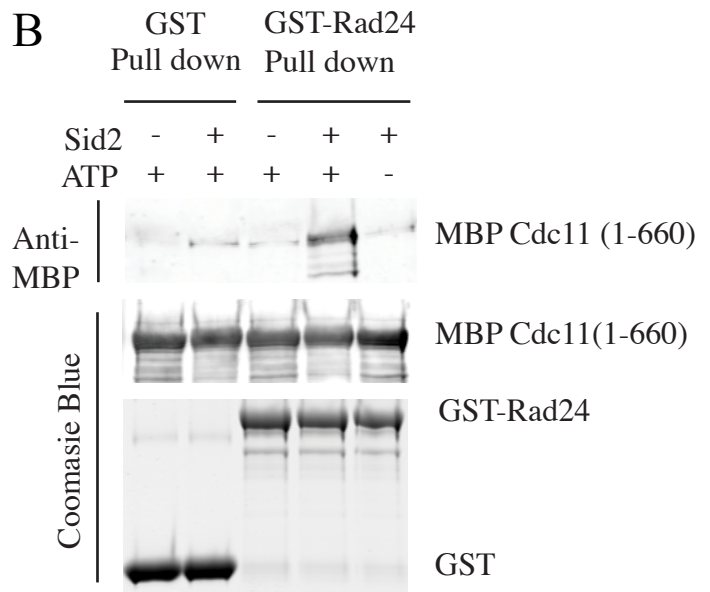

Figure S3

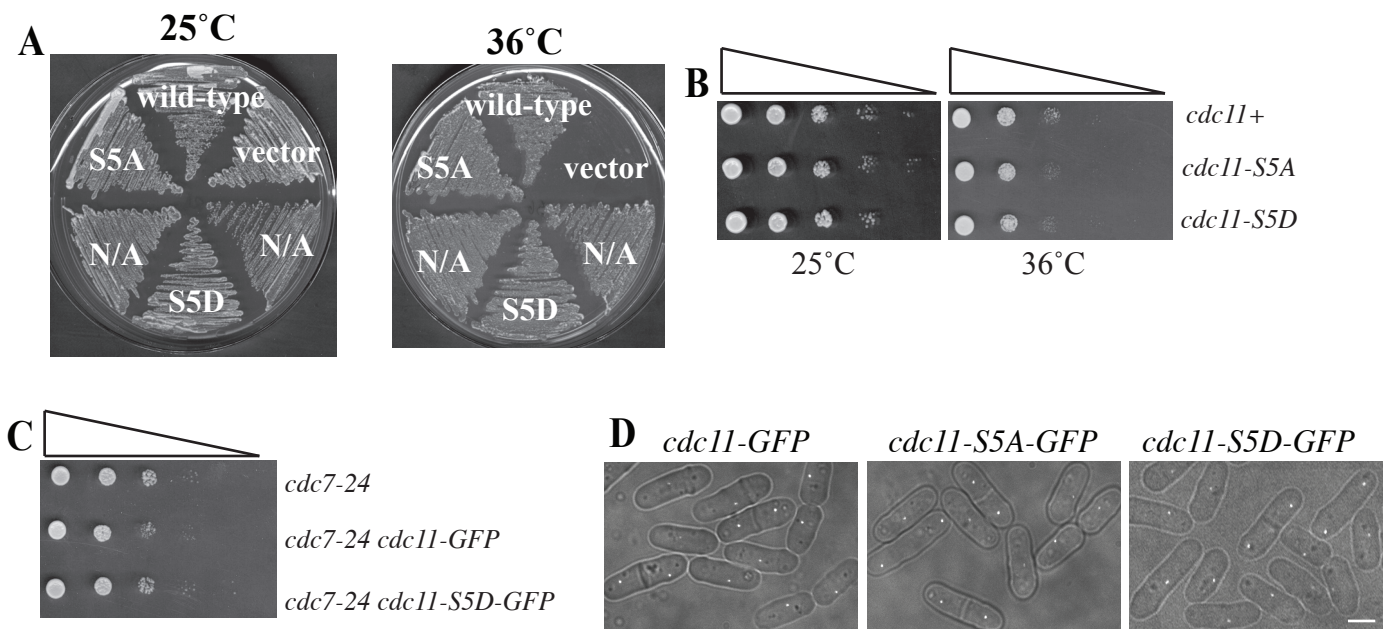

Figure S4

## Supplementary Figure Legends

Figure S1. Identification of Sid2-associated proteins. Sid2-TAP preparation from *cdc16-116* arrested cells was analyzed by 2D-LC-mass spectrometry. Identified co-purifying proteins are listed.

Figure S2. Defining regions containing Sid2-Mob1 phosphorylation sites. A) Sid2-Myc<sub>13</sub> was immunoprecipitated from *cdc16-116* cells that had been shifted to 36°C for 4 h and the immunoprecipitate was incubated with Myelin Basic Protein as a positive control, MBP, or the indicated MBP-Cdc11 fusion protein in the presence of labeled ATP. Following 30 minutes at 30°C, the reactions were resolved by SDS-PAGE. The gel was stained with Coomassie blue (lower panel), dried, and then exposed to film (upper panel). B) Phosphotryptic peptides from the indicated labeled Cdc11 proteins were separated in two dimensions with the anode on the left. The positions of major phosphopeptides are numbered.

Figure S3. Identification of Sid2-Mob1 phosphorylation sites. A) Phosphotryptic peptides from the indicated labeled Cdc11 proteins were separated in two dimensions with the anode on the left. The positions of major phosphopeptides are numbered. The asterisks indicate minor phosphopeptides. B) MBP-Cdc11(1-660) was pre-incubated with Sid2 kinase in the presence or absence of unlabeled ATP, and then incubated with GST or GST-Rad24 bound to glutathione sepharose. Bound proteins were detected by Western blot using anti-MBP monoclonal antibody (New England BioLabs) (upper panel). Input proteins are shown in the bottom panels.

Figure S4. Characterization of Sid2 phosphomutants. A) pIRT2 vector alone or containing the indicated *cdc11* alleles was transformed into *cdc11-123* cells. Transformants were struck to selective plates and incubated at the indicated temperatures. N/A is non-applicable. B and C) The indicated strains were grown to mid-log phase at 25°C in YE and spotted in 10-fold serial dilutions on a YE plate and incubated at 25°C. The indicated *cdc11* alleles without epitope tags were integrated at the endogenous *cdc11* locus. D) Live cell imaging of the indicated *cdc11* alleles tagged at their endogenous loci with GFP. Scale bar, 5 μm.

**Table S1. Phosphopeptides identified by mass spectrometric analysis of Cdc11 purified from cells.**

**A. Cdk1 sites**

**S98(43):**

DIFARLDLENMFEESKQ**S**  
DIFARLDLENMFEESKQ**S**PPSKSPTKNPSKK  
LDLENMFEESKQ**S**  
LDLENMFEESKQ**S**PPS  
LDLENMFEESKQ**S**PPSK  
LDLENMFEESKQ**S**PPSKSPTK  
LDLENMFEESKQ**S**PPSKSPTKNPSKK  
Q**S**PPSKSPTKNPSKKSSNNSS

**S103(3):**

LDLENMFEESKQ**S**PPSK**S**PTK  
LDLENMFEESKQ**S**PPSK**S**PTKNP  
SKQ**S**PPSK**S**PTKNPSKKSSNNSSRRSS

**S136(5):**

SSSSVGKLSNVSNMQ**S**PSKDPFVSQDYEKESIS  
SSSSVGKLSNVSNMQ**S**PSKDPFVSQDYEKESISSS  
LSNVSNMQ**S**PSKDPFVSQDYEK  
LSNVSNMQ**S**PSKDPFVSQDYEK

**199(6):**

SSSSVV**S**PSLKPNTSP  
SSVV**S**PSLKPNTSP

**208(7):**

SSSSVV**S**PSLKPNT**S**PL  
SSSSVV**S**PSLKPNT**S**PL  
SSSSVV**S**PSLKPNT**S**PLK  
SS**S**PSLKPNT**S**PL  
SS**S**PSLKPNT**S**PLKL

**S360(12):**

RVTSIFNDNDDSFPSASS**S**PQR  
VTSIFNDNDDSFPSASS**S**PQR  
TSIFNDNDDSFPSASS**S**PQRQ  
SIFNDNDDSFPSASS**S**PQR  
SIFNDNDDSFPSASS**S**PQRQ  
FNDNDDSFPSASS**S**PQRQ  
FNDNDDSFPSASS**S**PQR  
FNDNDDSFPSASS**S**PQRQA  
DSFPSASS**S**PQRQAYMT  
PSASS**S**PQRQAY

**S393(3):**

LN**S**SPKSTLKTS  
TDKMPLREIDVGSSQSSSKTARLN**S**SPK  
ARLN**S**SPKSTLK

S558(61):  
 SSFHDL**SLQ**NESFDEMFNGRYENG**S**PIPFIS  
 SSFHDL**SLQ**NESFDEMFNGRYENG**S**PIPFISSGSG  
 SSFHDL**SLQ**NESFDEMFNGRYENG**S**PIPFISSGSGLK  
 SSFHDL**SLQ**NESFDEMFNGRYENG**S**PIPFISSGSGLK  
 SFHDL**SLQ**NESFDEMFNGRYENG**S**PIPFIS  
 FHDL**SLQ**NESFDEMFNGRYENG**S**PIPFISSGSGLK  
**SLQ**NESFDEMFNGRYENG**S**PIPF  
**SLQ**NESFDEMFNGRYENG**S**PIPFISSGSGLK  
**SLQ**NESFDEMFNGRYENG**S**PIPFISSGSG  
**SLQ**NESFDEMFNGRYENG**S**PIPFISSGSGLK  
 NESFDEMFNGRYENG**S**PIPF  
 NESFDEMFNGRYENG**S**PIPF  
 NESFDEMFNGRYENG**S**PIPFIS  
 SFDEMFNGRYENG**S**PIPF  
 YENG**S**PIPFISSGSGLK  
 NGRYENG**S**PIPF

B. RXXS sites

S121, S122(3):  
 KKSSNNSRRR**SS**SVGKLSNV  
**SS**SVGKLSNVSNMQSSPSKDP  
**SS**SVGKLSNVSNMQSSPSKDPFVSQDYE

S264(8):  
 KPMRTTERK**ASL**NTKDLYQEVEEVMAR  
 PMRTTERK**ASL**NTKDLYQEVEEVMAR  
 ERK**ASL**NTKDLYQEVEEVMAR

S345(3):  
 DQLHLK**SLQ**SMKRVT**S**IFN  
 K**SLQ**SMKRVT**S**IFNDNDDSFPSASSSPQR  
**TS**IFNDNDDSFPSASSSPQRQAYMTDKMPLREID

S418(5):  
 RKV**SD**YPNMVVITPADLPEGIDTTQGSMEFDR  
**SD**YPNMVVITPADLPEGIDTTQGSMEFDR  
 KV**SD**YPNMVVITPADLPEGIDTTQGSMEFDR  
 AQSSKRKV**SD**YPNMVVITPADLPEGIDTTQGSME  
 VKTRRSHSAQSSKRKV**SD**YPN

The results are collated from 6 separate experiments. The phosphorylated residue number is given, followed by the sequence of each unique phosphopeptide. Certain phosphopeptides were identified multiple times. The phosphorylated residues are indicated in bold typeface.

**Table S2 *S. pombe* strains used in this study**

| <b>Strain</b> | <b>Genotype</b>                                                                                                     | <b>Source</b> |
|---------------|---------------------------------------------------------------------------------------------------------------------|---------------|
| KGY653        | <i>cdc11-123 ade6-M210 ura4-D18 leu1-32 h<sup>-</sup></i>                                                           | This study    |
| KGY863        | <i>sid2-myc<sub>13</sub>::Kan<sup>R</sup> mob1-R4 leu1-32 ade6-M210 leu1-32 h<sup>90</sup></i>                      | This study    |
| KGY1471       | <i>sid2-250 cdc7-GFP::Kan<sup>R</sup> ura4-D18 leu1-32 ade6-M210 h<sup>-</sup></i>                                  | This study    |
| KGY1472       | <i>cdc7-GFP::Kan<sup>R</sup> sid2-myc<sub>13</sub>::Kan<sup>R</sup> ade6-M210 ura4-D18 leu1-32 h<sup>+</sup></i>    | This study    |
| KGY1548       | <i>sid2-TAP::Kan<sup>R</sup> cdc16-116 ade6-M210 h<sup>-</sup></i>                                                  | This study    |
| KGY2061       | <i>cdc7-24 ade6-M210 ura4-D18 leu1-32 h<sup>-</sup></i>                                                             | Lab stock     |
| KGY2678       | <i>spg1-GFP::Kan<sup>R</sup> ade6-M210 ura4-D18 leu1-32 h<sup>+</sup></i>                                           | This study    |
| KGY3201       | <i>cdc11-GFP::Kan<sup>R</sup> ade6-M210 ura4-D18 leu1-32 h<sup>-</sup></i>                                          | This study    |
| KGY3392       | <i>cdc11-GFP::Kan<sup>R</sup> ade6-M210 ura4-D18 leu1-32 h<sup>+</sup></i>                                          | Lab stock     |
| KGY3529       | <i>sid2-myc<sub>13</sub>::ura4<sup>+</sup> cdc25-22 ade6-M21X ura4-D18 leu1-32 h<sup>+</sup></i>                    | Lab stock     |
| KGY3736       | <i>sid2-myc<sub>13</sub>::Kan<sup>R</sup> ade6-M21X, ura4-D18 leu1-32 h<sup>+</sup></i>                             | This study    |
| KGY4044       | <i>cdc7-GFP::Kan<sup>R</sup> ade6-M210 ura4-D18 leu1-32 h<sup>+</sup></i>                                           | Lab stock     |
| KGY4321       | <i>sid2-myc<sub>13</sub>::Kan<sup>R</sup> cdc16-116 ade6-M210 ura4-D18 leu1-32 h<sup>+</sup></i>                    | Lab stock     |
| KGY6065       | <i>sid2-myc<sub>13</sub>::Kan<sup>R</sup> nda3-KM311 ade6-M21X ura4-D18 leu1-32 h<sup>+</sup></i>                   | Lab stock     |
| KGY7574       | <i>cdc11-S5A ade6-M210 leu1-32 ura4-D18 h<sup>-</sup></i>                                                           | This study    |
| KGY7662       | <i>cdc11-S5A-GFP::Kan<sup>R</sup> ade6-M210 ura4-D18 leu1-32 h<sup>-</sup></i>                                      | This study    |
| KGY7779       | <i>cdc11-S5A-GFP::Kan<sup>R</sup> cdc25-22 ade6-M210 ura4-D18 leu1-32 h<sup>+</sup></i>                             | This study    |
| KGY7799       | <i>cdc7-24 cdc11-GFP::Kan<sup>R</sup> ade6-M210 ura4-D18 leu1-32 h<sup>+</sup></i>                                  | This study    |
| KGY7800       | <i>cdc11-GFP::Kan<sup>R</sup> cdc25-22 ade6-M210 ura4-D18 leu1-32 h<sup>+</sup></i>                                 | Lab stock     |
| KGY7960       | <i>cdc7-A20 ura4-D18 ade6-M210 leu1-32 h<sup>-</sup></i>                                                            | Lab stock     |
| KGY8018       | <i>cdc15-GFP::Kan<sup>R</sup> sid4-mCherry:: Kan<sup>R</sup> ade6-M210 ura4-D18 leu1-32 h<sup>+</sup></i>           | This study    |
| KGY 8021      | <i>cdc7-A20 cdc11-S5A-GFP::Kan<sup>R</sup> ade6-M210 ura4-D18 leu1-32 h<sup>-</sup></i>                             | This study    |
| KGY8023       | <i>cdc7-GFP::Kan<sup>R</sup> cdc11-S5A ade6-M210 ura4-D18 leu1-32 h<sup>-</sup></i>                                 | This study    |
| KGY8061       | <i>cdc11-S5A cdc15-GFP::Kan<sup>R</sup> sid4-mCherry:: Kan<sup>R</sup> ade6-M210 ura4-D18 leu1-32 h<sup>-</sup></i> | This study    |
| KGY8086       | <i>cdc7-A20 cdc11-GFP::Kan<sup>R</sup> ade6-M210 ura4-D18 leu1-32 h<sup>-</sup></i>                                 | This study    |
| KGY8250       | <i>cdc11-S5D ade6-M210 leu1-32 ura4-D18 h<sup>-</sup></i>                                                           | This study    |
| KGY8283       | <i>cdc11-S5D-GFP::Kan<sup>R</sup> ade6-M210 ura4-D18 leu1-32 h<sup>-</sup></i>                                      | This study    |
| KGY8305       | <i>cdc7-GFP::Kan<sup>R</sup> cdc11-S5D ade6-M210 ura4-D18 leu1-32 h<sup>-</sup></i>                                 | This study    |
| KGY8309       | <i>cdc7-24 cdc11-S5D-GFP::Kan<sup>R</sup> ade6-M210 ura4-D18 leu1-32 h<sup>-</sup></i>                              | This study    |
| KGY8348       | <i>cdc7-A20 cdc11-S5D-GFP::Kan<sup>R</sup> ura4-D18 leu1-32 ade6-M210 h<sup>+</sup></i>                             | This study    |
| KGY8358       | <i>cdc11-S5D-GFP::Kan<sup>R</sup> cdc25-22 ura4-D18 h<sup>+</sup></i>                                               | This study    |
| KGY8505       | <i>sid2-GFP::ura4<sup>+</sup> cdc11-S5A ade6-M210 ura4-D18 leu1-32 h<sup>+</sup></i>                                | This study    |
| KGY8517       | <i>sid2-GFP::ura4<sup>+</sup> cdc11-S5D ade6-M210 ura4-D18 leu1-32 h<sup>+</sup></i>                                | This study    |



|          |                                                                                                                            |            |
|----------|----------------------------------------------------------------------------------------------------------------------------|------------|
| KGY8609  | <i>sid2-GFP::ura4<sup>+</sup> ade6-M210 ura4-D18 leu1-32 h<sup>+</sup></i>                                                 | This study |
| KGY9305  | <i>cdc7-GFP::Kan<sup>R</sup> sid2-myc<sub>13</sub>::Kan<sup>R</sup> cdc11-S5A ade6-M210 ura4-D18 leu1-32 h<sup>+</sup></i> | This study |
| KGY10398 | <i>cdc11-S5D cdc15-GFP::Kan<sup>R</sup> sid4-mCherry:: Kan<sup>R</sup> ade6-M210 ura4-D18 leu1-32 h<sup>-</sup></i>        | This study |
| MBY7310  | <i>sid1-239 cdc7-GFP::ura4<sup>+</sup> mCherry-atb2::hph ade6-m21X ura4-D18 leu1-32</i>                                    | This study |
| MBY7313  | <i>sid2-250 cdc7-GFP::ura4<sup>+</sup> mCherry-atb2::hph ade6-m21X ura4-D18 leu1-32</i>                                    | This study |
